# Supplementary material for: Zika virus dysregulates human Sertoli cell proteins involved in spermatogenesis with little effect on tight junctions
Source: PubMed Central journal article supplement (PMC7279580; doi:10.1371/journal.pntd.0008335), 2020-06-08
Supplement: pntd.0008335.s002.pdf [file pntd.0008335.s002.pdf]

Cardiovascular System Development and Function, Organismal Development, Cancer

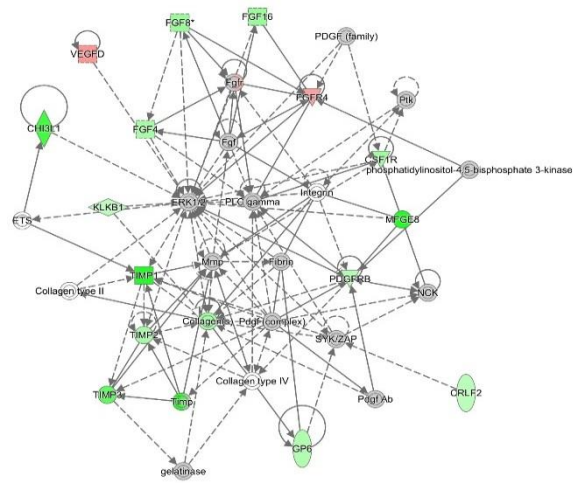

Cell-To-Cell Signaling and Interaction, Cellular Assembly and Organization, Hematological System Development and Function

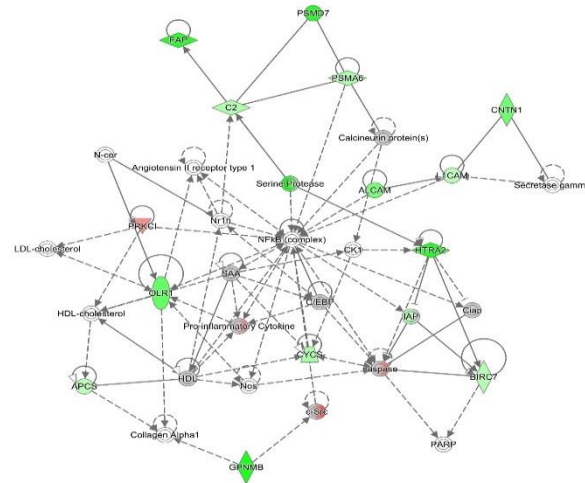

Cellular Development, Hereditary Disorder, Neurological Disease

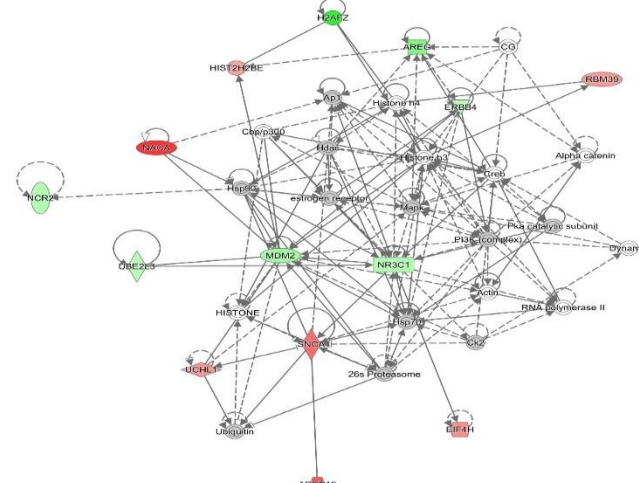

Cardiac Damage, Cardiovascular Disease, Organismal Injury and Abnormalities

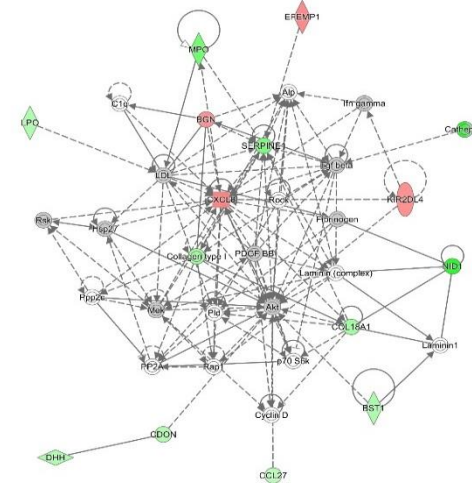

Cellular Compromise, Inflammatory Response, Cancer

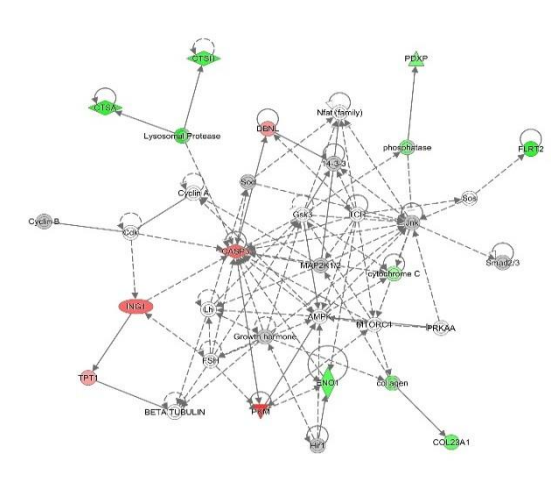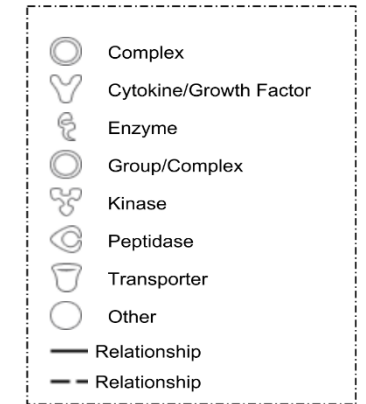

Post-Translational Modification, Protein Degradation, Protein Synthesis

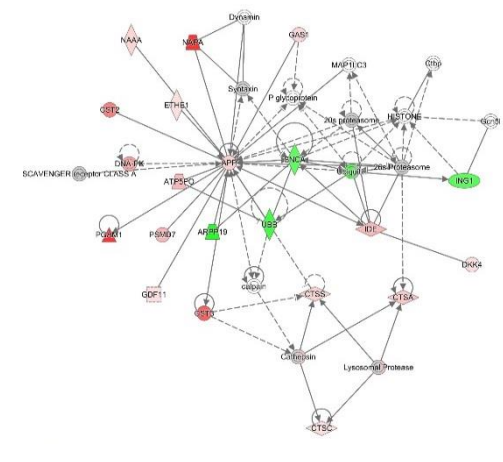

Protein Synthesis, Cellular Movement, Cardiovascular Disease

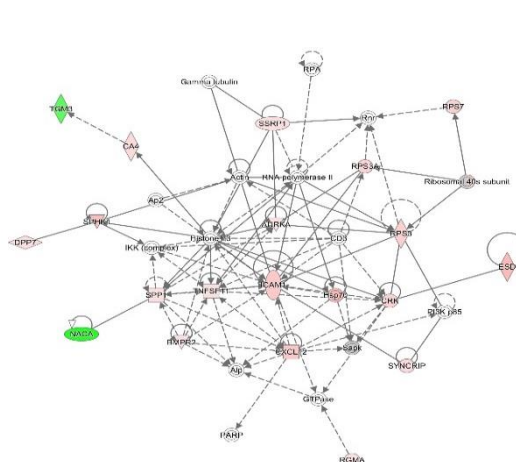

Protein Synthesis, Dermatological Diseases and Conditions, Hereditary Disorder

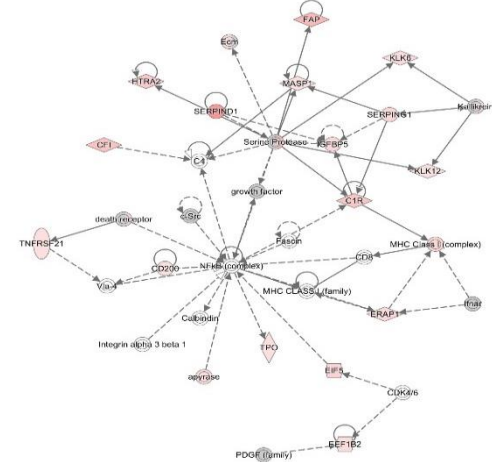

Cardiovascular System Development and Function, Cellular Movement, Cell Death and Survival

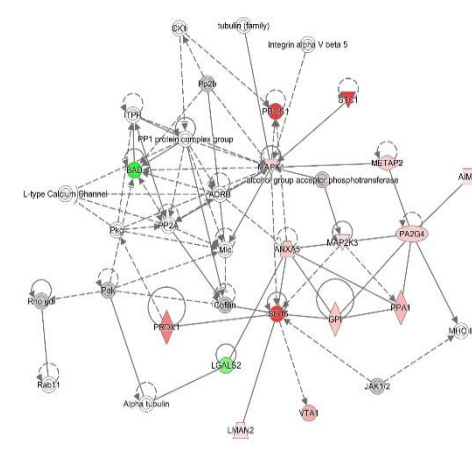

Hematological System Development and Function, Tissue Development, Immune Cell Trafficking

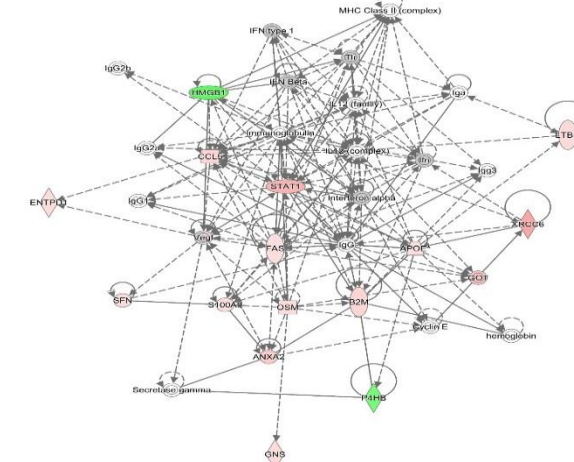

Cell Death and Survival, Cellular Growth and Proliferation, Connective Tissue Development and Function

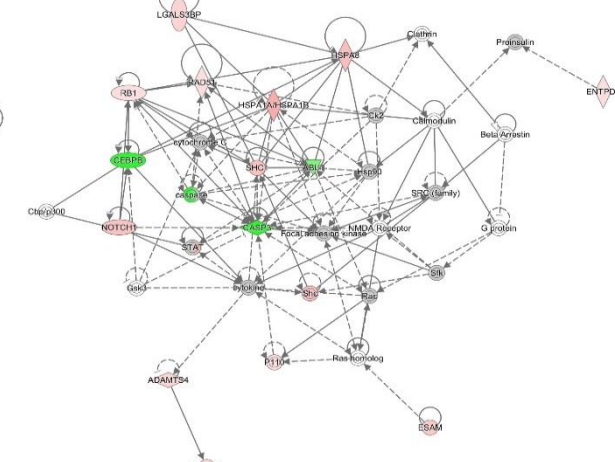

**Supplementary Figure S2. IPA-generated molecular networks of dysregulated proteins at 3 and 5 dpi.** The datasets containing protein IDs, fold changes, and P-values were imported into the IPA software, and interacting networks were assembled for differentially expressed proteins at 3 and 5 dpi. Up- and down-regulated proteins are indicated in red and green, respectively; gray proteins denote those that were identified in this study but not dysregulated; colorless proteins interact with various proteins in the pathway but were not recognized in our screening.
