# Supplementary material for: Zika virus dysregulates human Sertoli cell proteins involved in spermatogenesis with little effect on tight junctions
Source: PubMed Central journal article supplement (PMC7279580; doi:10.1371/journal.pntd.0008335), 2020-06-08
Supplement: pntd.0008335.s004.pdf [file pntd.0008335.s004.pdf]

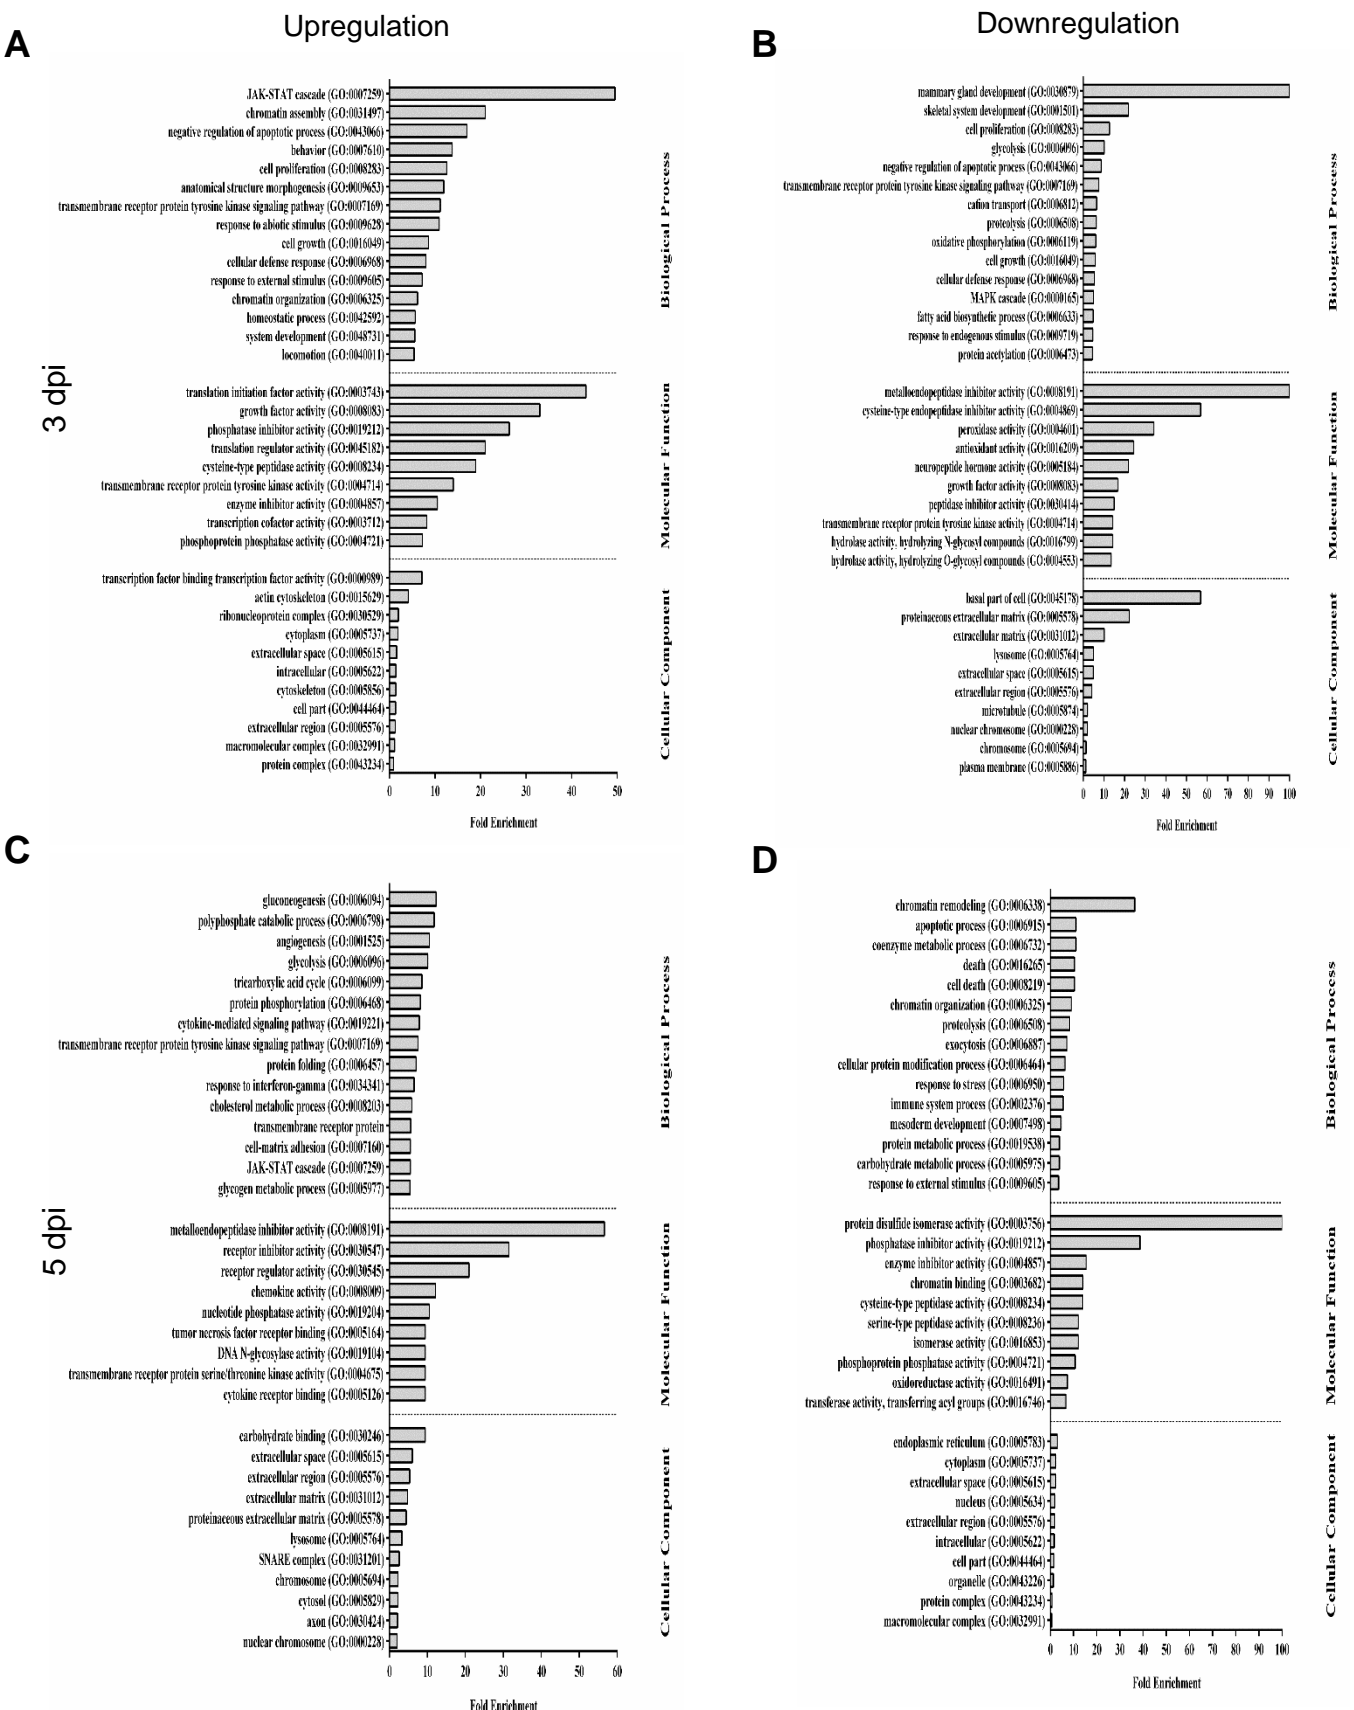

**Supplementary Figure S4. Gene ontology (GO) analysis of up- and down-regulated proteins.** Up- and down-regulated proteins were analysed by PANTHER and GOTERM database separately and their associations to biological processes, molecular functions, and cellular components determined. Upregulated and downregulated protein functions at 1, 3 and 5 dpi are listed in a, b, c and d respectively.
