# Supplementary material for: Zika virus dysregulates human Sertoli cell proteins involved in spermatogenesis with little effect on tight junctions
Source: PLOS journal article supplement (doi:10.1371/journal.pntd.0008335), 2020-06-08
Supplement: S1 (10.1371/journal.pntd.0008335.s001) [file journal.pntd.0008335.s001]

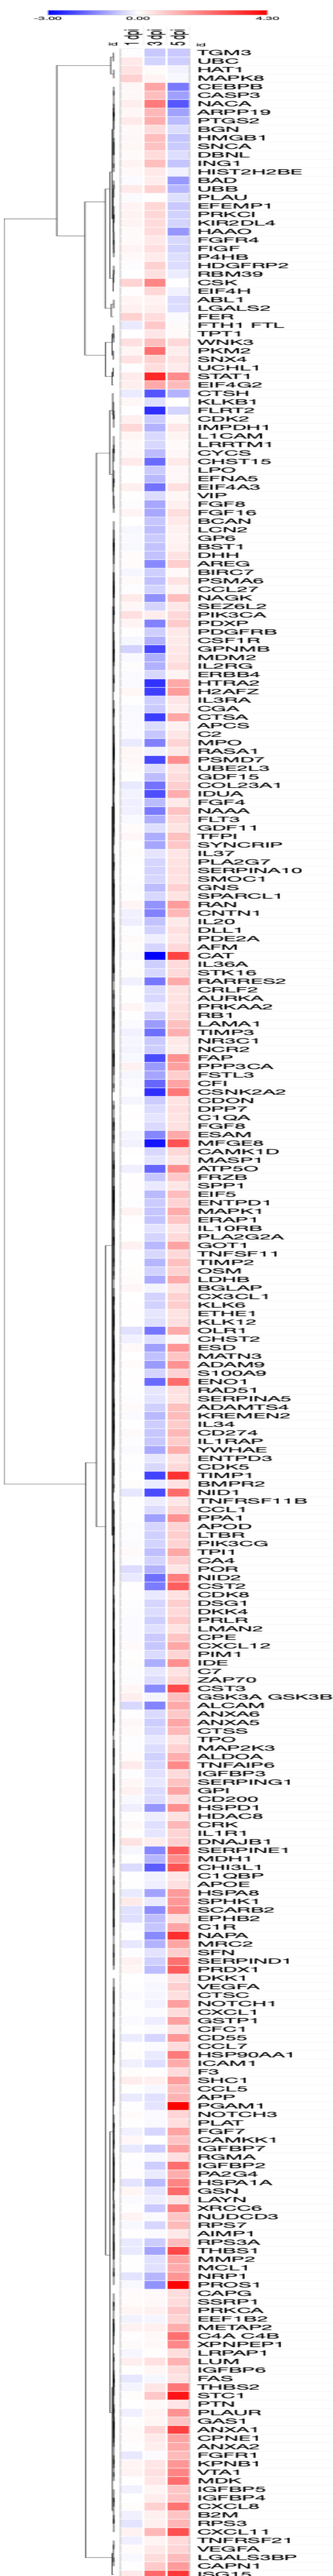

**Supplementary Figure S1.** Heat map of differentially expressed (fold change > 1.33 or < -1.33) proteins at 1, 3 and 5 days post ZIKV infection. Up- and down-regulated proteins are highlighted in red and blue, respectively.
