# Supplementary material for: Zika virus dysregulates human Sertoli cell proteins involved in spermatogenesis with little effect on tight junctions
Source: PLoS Negl Trop Dis. 2020 Jun 8;14(6):e0008335. doi: 10.1371/journal.pntd.0008335 (PMC7279580; doi:10.1371/journal.pntd.0008335)
Supplement: S1 Table — dpi = days post infection, red = significantly up-regulated; green = significantly down-regulated; purple = p value < 0.05. Table sorted first by significantly up-regulated proteins at day 1 post-infection, then by those significantly down-regulated at 1dpi; then by significantly up- and down-regulated at 3dpi; then by significantly up- and down-regulated at 5dpi. (XLSX) [file pntd.0008335.s006.xlsx]

## Sheet: S1 Table
S1 Table. List of ZIKV-induced dysregulated HSerC proteins.
Entrez Gene Symbol	Protein	1dpi		3dpi		5dpi
		Fold Change	P-Value	Fold Change	P-Value	Fold Change	P-Value
MAPK8	Mitogen-activated protein kinase 8	1.72	5.5e-06	1.15	0.73	-1.06	0.8
FER	Tyrosine-protein kinase Fer	1.7	6.3e-06	1.5	0.54	-1.05	0.84
CSK	Tyrosine-protein kinase CSK	1.66	1.2e-05	4.12	7e-05	1	0.99
IMPDH1	Inosine-5'-monophosphate dehydrogenase 1	1.59	0.00012	-1.88	0.35	1.32	0.22
PIK3CA PIK3R1	PIK3CA/PIK3R1	1.45	0.0021	1.24	0.64	1.55	0.03
WNK3	Serine/threonine-protein kinase WNK3	1.45	0.0024	2.14	0.47	1.57	0.31
HAT1	Histone acetyltransferase type B catalytic subunit	1.4	0.0048	1.05	0.96	-1.1	0.49
SNX4	Sorting nexin-4	1.4	0.0067	1.7	0.4	1.39	0.16
DNAJB1	DnaJ homolog subfamily B member 1	1.38	0.0092	1.24	0.47	1.74	0.063
EPHB2	Ephrin type-B receptor 2	-1.3	0.0046	-1.69	0.5	1.47	0.046
POR	NADPH--cytochrome P450 reductase	-1.33	0.02	-1.87	0.68	1.35	0.55
ALCAM	CD166 antigen	-1.38	0.0065	-2.73	0.033	2.72	0.056
STAT1	Signal transducer and activator of transcription 1-alpha/beta	1.26	0.073	12.51	2e-05	3.9	0.006
ISG15	Ubiquitin-like protein ISG15	1.28	0.34	5.76	1.4e-06	10.4	0.0006
PKM2	Pyruvate kinase PKM	1.13	0.046	5.41	3.2e-06	1.25	0.73
NACA	Nascent polypeptide-associated complex subunit alpha	1.22	0.42	4.72	0.025	-3.94	8.4e-05
EIF4G2	Eukaryotic translation initiation factor 4 gamma 2	1.22	0.31	2.73	0.0033	2.21	0.27
ARPP19	cAMP-regulated phosphoprotein 19	1.1	0.65	2.31	0.0059	-2.15	0.0038
CASP3	Caspase-3	1.09	0.41	2.13	0.022	-2.19	0.00096
ING1	Inhibitor of growth protein 1	1.15	0.43	2.11	0.011	-1.62	0.019
SNCA	Alpha-synuclein	1.1	0.53	2.04	0.033	-1.52	0.038
FTH1 FTL	Ferritin	-1.18	0.1	1.87	0.011	1.06	0.6
CXCL8	Interleukin-8	1.04	0.87	1.72	0.0057	5.15	0.0028
HDGFRP2	Hepatoma-derived growth factor-related protein 2	-1.01	0.95	1.71	0.046	-1.32	0.21
EFEMP1	EGF-containing fibulin-like extracellular matrix protein 1	1.15	0.57	1.6	0.018	-1.56	0.078
PRKCI	Protein kinase C iota type	1.16	0.24	1.59	0.00011	-1.44	0.08
EIF4H	Eukaryotic translation initiation factor 4H	1.02	0.86	1.59	0.014	-1.12	0.085
DBNL	Drebrin-like protein	1.06	0.33	1.53	0.005	-1.31	0.079
KIR2DL4	Killer cell immunoglobulin-like receptor 2DL4	1.14	0.41	1.52	0.043	-1.42	0.12
BGN	Biglycan	1.09	0.74	1.51	0.024	-1.32	0.17
UCHL1	Ubiquitin carboxyl-terminal hydrolase isozyme L1	-1.01	0.91	1.48	0.02	1.26	0.026
FIGF	Vascular endothelial growth factor D	1.15	0.54	1.46	0.048	-1.43	0.085
RBM39	RNA-binding protein 39	1.01	0.98	1.44	0.011	-1.17	0.36
TPT1	Translationally-controlled tumor protein	1	0.95	1.34	0.026	1.07	0.6
FGFR4	Fibroblast growth factor receptor 4	1.08	0.67	1.32	0.034	-1.37	0.084
HIST2H2BE	Histone H2B type 2-E	1.08	0.29	1.3	0.036	-1.12	0.38
CHST2	Carbohydrate sulfotransferase 2	-1.12	0.6	-1.3	0.0065	1.09	0.63
KLKB1	Plasma kallikrein	1.1	0.7	-1.3	0.024	1	0.98
APCS	Serum amyloid P-component	-1.04	0.88	-1.32	0.0063	1.18	0.51
VIP	Vasoactive Intestinal Peptide	1.02	0.94	-1.33	0.041	1.11	0.63
CRLF2	Cytokine receptor-like factor 2	1.02	0.94	-1.33	0.043	1.38	0.18
UBE2L3	Ubiquitin-conjugating enzyme E2 L3	1.06	0.79	-1.35	0.01	1.4	0.31
FGF8	Fibroblast growth factor 8 isoform B	-1	0.99	-1.35	0.016	1.42	0.075
L1CAM	Neural cell adhesion molecule L1	1.12	0.65	-1.36	0.013	1.14	0.5
LRRTM1	Leucine-rich repeat transmembrane neuronal protein 1	1.06	0.82	-1.37	0.01	1.07	0.8
ERBB4	Receptor tyrosine-protein kinase erbB-4	-1.04	0.89	-1.38	0.044	1.15	0.41
KIRREL3	Kin of IRRE-like protein 3	-1	1	-1.39	0.049	1.14	0.61
SEZ6L2	Seizure 6-like protein 2	1.09	0.71	-1.42	0.0002	1.32	0.37
CCL27	C-C motif chemokine 27	-1.01	0.96	-1.43	0.02	1.15	0.58
IL3RA	Interleukin-3 receptor subunit alpha	1.01	0.96	-1.48	0.0061	1.34	0.42
BIRC7	Baculoviral IAP repeat-containing protein 7 Isoform beta	-1.08	0.75	-1.48	0.0083	1.07	0.79
PDGFRB	Platelet-derived growth factor receptor beta	1.02	0.94	-1.49	0.0055	1.31	0.35
NCR2	Natural cytotoxicity triggering receptor 2	-1.09	0.65	-1.49	0.027	1.24	0.47
CDON	Cell adhesion molecule-related/down-regulated by oncogenes	-1.09	0.7	-1.51	0.024	1.37	0.23
CDK2 CCNA2	Cyclin-dependent kinase 2:Cyclin-A2 complex	1.19	0.68	-1.53	0.023	1.06	0.87
GP6	Platelet glycoprotein VI	-1.05	0.77	-1.53	0.043	1.15	0.64
NR3C1	Glucocorticoid receptor	-1.07	0.7	-1.54	0.0055	1.32	0.36
CGA TSHB	Thyroid Stimulating Hormone	-1.06	0.82	-1.54	0.021	1.23	0.42
LPO	Lactoperoxidase	1.01	0.97	-1.54	0.029	1.1	0.73
C2	Complement C2	-1.03	0.88	-1.58	0.048	1.34	0.34
BCAN	Brevican core protein	1	1	-1.61	0.025	1.29	0.33
DHH	Desert hedgehog protein N-product	1.05	0.83	-1.64	0.017	1.39	0.36
IL20	Interleukin-20	-1.15	0.51	-1.64	0.045	1.28	0.39
BST1	ADP-ribosyl cyclase/cyclic ADP-ribose hydrolase 2	-1.06	0.79	-1.65	0.039	1.18	0.48
PSMA6	Proteasome subunit alpha type-6	1.07	0.82	-1.66	0.029	1.38	0.35
LCN2	Neutrophil gelatinase-associated lipocalin	-1.07	0.75	-1.7	0.012	1.17	0.41
CYCS	Cytochrome c	1.09	0.56	-1.73	0.026	1.09	0.7
FGF4	Fibroblast growth factor 4	-1.14	0.6	-1.74	0.0089	1.27	0.42
EFNA5	Ephrin-A5	-1.01	0.98	-1.78	0.031	1.09	0.73
TIMP2	Metalloproteinase inhibitor 2	-1.01	0.96	-1.81	0.0011	2.1	0.01
IL2RG	Cytokine receptor common subunit gamma	1.03	0.9	-1.89	0.017	1.51	0.27
COL18A1	Endostatin	1.03	0.9	-1.89	0.023	1.8	0.064
CSF1R	Macrophage colony-stimulating factor 1 receptor	-1.08	0.73	-1.89	0.028	1.28	0.44
MDM2	E3 ubiquitin-protein ligase Mdm2	-1.05	0.83	-1.91	0.014	1.35	0.42
FGF16	Fibroblast growth factor 16	1.14	0.61	-2.03	0.01	1.47	0.41
FGF8	Fibroblast growth factor 8 isoform A	-1.03	0.89	-2.04	0.019	1.2	0.63
AREG	Amphiregulin	1.05	0.84	-2.62	0.017	1.77	0.33
SERPINE1	Plasminogen activator inhibitor 1	-1.08	0.78	-2.67	0.046	6.56	0.014
PDXP	Pyridoxal phosphate phosphatase	1.13	0.59	-2.77	0.012	1.83	0.3
CNTN1	Contactin-1	-1.13	0.51	-2.78	0.03	2.31	0.087
MPO	Myeloperoxidase	-1.17	0.44	-2.81	0.024	1.65	0.35
NAAA	N-acylethanolamine-hydrolyzing acid amidase	-1.13	0.59	-2.96	0.048	2.05	0.027
RARRES2	Retinoic acid receptor responder protein 2	-1.13	0.18	-3.01	0.017	2.66	0.098
OLR1	Oxidized low-density lipoprotein receptor 1	-1.29	0.25	-3.05	0.016	2.69	0.082
EIF4A3	Eukaryotic initiation factor 4A-III	1.2	0.35	-3.12	0.014	1.45	0.55
COL23A1	Collagen alpha-1(XXIII) chain	-1.2	0.31	-3.13	0.029	1.77	0.31
TIMP3	Metalloproteinase inhibitor 3	-1.12	0.6	-3.21	0.01	2.56	0.017
CHST15	Carbohydrate sulfotransferase 15	1.27	0.55	-3.35	0.022	1.29	0.66
ENO1	Alpha-enolase	1.02	0.9	-3.38	0.0076	5.52	0.2
CFI	Complement factor I	-1.04	0.91	-3.45	0.0066	2.94	0.015
CHI3L1	Chitinase-3-like protein 1	-1.34	0.32	-3.77	0.0001	7.37	0.038
CTSH	Cathepsin H	-1.18	0.55	-3.99	0.002	-1.86	0.27
IDUA	Alpha-L-iduronidase	-1.1	0.73	-4.23	0.0012	2.61	0.0089
NID1	Nidogen-1	-1.22	0.19	-4.34	0.00097	5.74	0.015
FAP	Prolyl endopeptidase FAP	-1.06	0.57	-4.34	0.00097	3.65	0.0057
GPNMB	Transmembrane glycoprotein NMB	-1.44	0.29	-4.43	0.00081	1.33	0.33
PSMD7	26S proteasome non-ATPase regulatory subunit 7	1.1	0.7	-4.44	0.011	3.7	0.003
TIMP1	Metalloproteinase inhibitor 1	1	1	-4.64	0.00053	11.02	0.044
H2AFZ	Histone H2A.z	1.11	0.52	-4.84	0.018	3.18	0.018
CTSA	Lysosomal protective protein	-1.05	0.74	-4.85	0.00035	2.84	0.0032
HTRA2	Serine protease HTRA2, mitochondrial	-1.05	0.81	-5.3	0.00014	2.74	0.018
FLRT2	Leucine-rich repeat transmembrane protein FLRT2	1.01	0.98	-5.44	0.00011	-1.42	0.51
CSNK2A2 CSNK2B	Casein kinase II 2-alpha':2-beta heterotetramer	-1.01	0.94	-5.46	0.00011	4.84	0.22
MFGE8	Lactadherin	-1.12	0.42	-6.75	1e-05	7.46	0.13
CAT	Catalase	-1.04	0.76	-7.98	1.3e-06	8.88	0.1
PGAM1	Phosphoglycerate mutase 1	1.02	0.73	-1.25	0.69	23.24	0.038
PROS1	Vitamin K-dependent protein S	-1.06	0.73	-2.41	0.068	18.92	0.0018
STC1	Stanniocalcin-1	1.04	0.94	1.92	0.18	15.41	7.4e-05
NAPA	Alpha-soluble NSF attachment protein	1.01	0.63	-2.59	0.31	11.39	0.0012
ANXA1	Annexin A1	1.07	0.19	1.62	0.66	9.23	0.0016
THBS1	Thrombospondin-1	-1.19	0.51	-2.1	0.45	8.35	0.037
CST3	Cystatin-C	1.1	0.72	-2.59	0.15	8.16	0.012
CXCL11	C-X-C motif chemokine 11	1.17	0.69	2.29	0.15	7.73	0.00028
PRDX1	Peroxiredoxin-1	1.12	0.15	-1.72	0.41	6.66	0.025
CST2	Cystatin-SA	1.02	0.88	-2.92	0.068	6.5	0.014
GSN	Gelsolin	1.12	0.47	-1.25	0.85	5.72	0.048
MDK	Midkine	1.03	0.92	1.36	0.35	5.45	0.00015
IGFBP2	Insulin-like growth factor-binding protein 2	-1.02	0.97	-1.51	0.29	5.36	7.1e-05
C4A C4B	Complement C4	1.02	0.97	1.09	0.94	5.33	0.0055
SERPIND1	Heparin cofactor 2	1.17	0.43	-1.47	0.072	5.31	0.016
THBS2	Thrombospondin-2	-1.09	0.37	1.33	0.77	4.82	0.023
HSP90AA1 HSP90AB1	Heat shock protein HSP 90-alpha/beta	1.03	0.45	-1.18	0.88	4.71	0.0082
NID2	Nidogen-2	-1.2	0.3	-3.23	0.2	4.49	0.013
XRCC6	X-ray repair cross-complementing protein 6	1.02	0.94	-1.54	0.65	4.41	0.0015
HSPA1A	Heat shock 70 kDa protein 1A	-1.25	0.38	-1.74	0.6	4.19	0.044
VTA1	Vacuolar protein sorting-associated protein VTA1 homolog	1.17	0.2	1.44	0.79	4.17	0.015
XPNPEP1	Xaa-Pro aminopeptidase 1	1.06	0.62	1.09	0.95	3.99	0.048
TNFAIP6	Tumor necrosis factor-inducible gene 6 protein	1.26	0.21	-1.37	0.53	3.91	0.0047
MDH1	Malate dehydrogenase, cytoplasmic	1.01	0.94	-1.81	0.48	3.85	0.00095
SCARB2	Lysosome membrane protein 2	-1.29	0.11	-2.53	0.15	3.82	0.0048
ATP5O	ATP synthase subunit O, mitochondrial	-1.14	0.49	-3.47	0.083	3.71	0.0046
HSPD1	60 kDa heat shock protein, mitochondrial	-1.15	0.43	-2.36	0.14	3.64	0.022
IDE	Insulin-degrading enzyme	1.03	0.81	-1.93	0.29	3.6	0.022
PPA1	Inorganic pyrophosphatase	-1.01	0.92	-2.18	0.3	3.59	0.0066
PLAUR	Urokinase plasminogen activator surface receptor	-1.14	0.091	1.15	0.5	3.54	0.0001
ADAM9	Disintegrin and metalloproteinase domain-containing protein 9	1.05	0.69	-2.28	0.13	3.52	0.045
ESD	S-formylglutathione hydrolase	1.07	0.53	-2.19	0.26	3.46	0.0075
NRP1	Neuropilin-1	-1.24	0.17	-1.82	0.65	3.45	0.0089
KPNB1	Importin subunit beta-1	1.13	0.26	1.34	0.82	3.43	0.013
CD55	Complement decay-accelerating factor	-1.17	0.17	-1.41	0.21	3.36	0.0077
SPHK1	Sphingosine kinase 1	1.27	0.28	-1.17	0.85	3.29	0.027
HSPA8	Heat shock cognate 71 kDa protein	-1.18	0.18	-2.11	0.28	3.27	0.017
CAPN1 CAPNS1	Calpain I	-1.01	0.87	1.85	0.062	3.21	0.017
RAN	GTP-binding nuclear protein Ran	1.12	0.15	-2.4	0.25	3.19	0.0056
SHC1	SHC-transforming protein 1	1.24	0.18	1.2	0.76	3.13	0.0086
IGFBP7	Insulin-like growth factor-binding protein 7	-1.21	0.74	-1.5	0.3	3.12	0.012
NOTCH1	Neurogenic locus notch homolog protein 1	1.01	0.97	-1.12	0.4	3.08	0.00056
PPP3CA PPP3R1	Calcineurin	1.18	0.22	-2.28	0.24	3.05	0.016
GSTP1	Glutathione S-transferase P	-1.04	0.88	-1.16	0.88	3	0.044
CPNE1	Copine-1	1.05	0.12	1.3	0.86	2.98	0.025
MMP2	72 kDa type IV collagenase	1.01	0.94	-1.29	0.59	2.94	0.031
FGF7	Fibroblast growth factor 7	-1.13	0.44	-1.4	0.28	2.93	0.019
GOT1	Aspartate aminotransferase, cytoplasmic	1.17	0.13	-1.77	0.33	2.91	0.017
MRC2	C-type mannose receptor 2	-1.2	0.025	-1.87	0.52	2.9	0.0094
GPI	Glucose-6-phosphate isomerase	1.17	0.22	-1.34	0.81	2.89	0.015
C1R	Complement C1r subcomponent	-1.04	0.89	-1.6	0.33	2.87	0.01
ANXA5	Annexin A5	1.1	0.59	-1.51	0.14	2.82	0.0021
CXCL12	Stromal cell-derived factor 1	1.08	0.83	-1.58	0.25	2.8	0.0033
ANXA2	Annexin A2	1.01	0.87	1.22	0.82	2.75	0.0022
TPI1	Triosephosphate isomerase	1.07	0.38	-1.69	0.22	2.75	0.021
ESAM	Endothelial cell-selective adhesion molecule	-1.08	0.68	-2.68	0.1	2.7	0.033
MCL1	Induced myeloid leukemia cell differentiation protein Mcl-1	1.01	0.95	-1.27	0.34	2.68	0.0087
ICAM1	Intercellular adhesion molecule 1	-1.13	0.15	-1.3	0.37	2.66	0.0017
LDHB	L-lactate dehydrogenase B chain	1.05	0.54	-1.99	0.16	2.66	0.027
MAPK1	Mitogen-activated protein kinase 1	1.16	0.39	-1.6	0.68	2.65	0.032
METAP2	Methionine aminopeptidase 2	1.18	0.45	1.2	0.65	2.59	0.0022
PA2G4	Proliferation-associated protein 2G4	1.02	0.89	-1.18	0.87	2.59	0.045
YWHAE	14-3-3 protein epsilon	-1.04	0.77	-2.01	0.21	2.58	0.034
ALDOA	Fructose-bisphosphate aldolase A	1.05	0.66	-1.45	0.42	2.55	0.029
APP	Amyloid beta A4 protein	-1.18	0.42	-1.28	0.43	2.44	0.031
LUM	Lumican	1.21	0.44	1.43	0.46	2.42	0.0031
RPS3	40S ribosomal protein S3	-1.24	0.65	1.19	0.84	2.34	0.03
CRK	Adapter molecule crk	1.09	0.19	-1.29	0.81	2.32	0.049
CD274	Programmed cell death 1 ligand 1	1.06	0.65	-1.58	0.19	2.29	0.041
CTSS	Cathepsin S	1.07	0.81	-1.4	0.25	2.26	0.0083
RPS7	40S ribosomal protein S7	-1.06	0.86	-1.4	0.33	2.25	0.013
FGFR1	Fibroblast growth factor receptor 1	-1.21	0.2	-1.04	0.87	2.23	0.0025
LGALS3BP	Galectin-3-binding protein	-1.06	0.75	1.51	0.081	2.19	0.0039
KREMEN2	Kremen protein 2	-1.03	0.91	-1.77	0.08	2.19	0.043
EIF5	Eukaryotic translation initiation factor 5	1.02	0.88	-1.75	0.23	2.17	0.024
RPS3A	40S ribosomal protein S3a	-1.2	0.6	-1.52	0.64	2.15	0.046
NAGK	N-acetyl-D-glucosamine kinase	1.27	0.092	-2.47	0.27	2.14	0.017
CCL5	C-C motif chemokine 5	-1.01	0.98	-1.07	0.82	2.13	0.0047
GSK3A GSK3B	Glycogen synthase kinase-3 alpha/beta	1.22	0.38	-1.09	0.88	2.11	0.029
ADAMTS4	A disintegrin and metalloproteinase with thrombospondin motifs 4	1.07	0.72	-1.47	0.14	2.1	0.038
TFPI	Tissue factor pathway inhibitor	1.1	0.73	-1.95	0.15	2.09	0.00064
LAMA1 LAMB1 LAMC1	Laminin	-1.04	0.87	-2.24	0.14	2.08	0.026
SERPING1	Plasma protease C1 inhibitor	1.11	0.72	-1.22	0.33	2.03	0.016
IGFBP4	Insulin-like growth factor-binding protein 4	1	0.99	1.25	0.28	2.01	0.0068
CAMKK1	Calcium/calmodulin-dependent protein kinase kinase 1	1.1	0.71	1	0.97	2.01	0.0099
GAS1	Growth arrest-specific protein 1	-1.02	0.95	1.13	0.71	2	0.0068
B2M	Beta-2-microglobulin	-1.13	0.16	1.19	0.42	2	0.01
MATN3	Matrilin-3	-1	0.99	-1.66	0.13	2	0.022
CPE	Carboxypeptidase E	-1.03	0.92	-1.55	0.3	2	0.031
ERAP1	Endoplasmic reticulum aminopeptidase 1	1.02	0.89	-1.61	0.67	1.99	0.026
IGFBP5	Insulin-like growth factor-binding protein 5	-1.13	0.095	1.13	0.28	1.95	0.0018
NUDCD3	NudC domain-containing protein 3	1.15	0.41	-1.04	0.92	1.94	0.044
SYNCRIP	Heterogeneous nuclear ribonucleoprotein Q	1.01	0.95	-2.06	0.48	1.93	0.018
PRKCA	Protein kinase C alpha type	1.12	0.32	1.18	0.65	1.89	0.005
FRZB	Secreted frizzled-related protein 3	1.02	0.95	-1.58	0.2	1.88	0.021
ANXA6	Annexin A6	1.02	0.86	-1.35	0.43	1.88	0.029
IL1RAP	Interleukin-1 Receptor accessory protein	-1.02	0.95	-1.57	0.19	1.85	0.035
PRLR	Prolactin receptor	-1.03	0.92	-1.48	0.22	1.84	0.022
IL34	Interleukin-34	-1	0.99	-1.51	0.29	1.83	0.028
KLK6	Kallikrein-6	1.03	0.91	-1.45	0.32	1.79	0.013
LTBR	Tumor necrosis factor receptor superfamily member 3	-1.02	0.95	-1.46	0.22	1.78	0.018
FSTL3	Follistatin-related protein 3	-1.07	0.82	-2.08	0.11	1.77	0.0025
VEGFA	Vascular endothelial growth factor A	-1.01	0.97	-1.07	0.13	1.76	0.0026
DSG1	Desmoglein-1	-1.01	0.97	-1.41	0.25	1.76	0.019
SFN	14-3-3 protein sigma	-1.02	0.93	-1.26	0.29	1.75	0.022
CA4	Carbonic anhydrase 4	-1.02	0.94	-1.44	0.36	1.75	0.025
MAP2K3	Dual specificity mitogen-activated protein kinase kinase 3	-1.02	0.93	-1.33	0.28	1.72	0.026
GNS	N-acetylglucosamine-6-sulfatase	-1.02	0.9	-1.73	0.17	1.71	0.014
OSM	Oncostatin-M	1.03	0.9	-1.44	0.23	1.7	0.035
S100A9	Protein S100-A9	1.01	0.94	-1.42	0.37	1.68	0.02
ENTPD1	Ectonucleoside triphosphate diphosphohydrolase 1	-1.02	0.94	-1.53	0.12	1.68	0.033
CX3CL1	Fractalkine	1	0.99	-1.44	0.27	1.68	0.046
APOD	Apolipoprotein D	-1.03	0.92	-1.41	0.24	1.66	0.014
CCL1	C-C motif chemokine 1	1.01	0.95	-1.33	0.36	1.66	0.029
IL1R1	Interleukin-1 receptor type 1	1.01	0.98	-1.24	0.56	1.65	0.026
EEF1B2	Elongation factor 1-beta	-1.11	0.8	-1.09	0.73	1.64	0.003
PIK3CG	Phosphatidylinositol 4,5-bisphosphate 3-kinase catalytic subunit gamma isoform	-1.03	0.92	-1.43	0.25	1.64	0.015
PIM1	Serine/threonine-protein kinase pim-1	-1.01	0.97	-1.34	0.17	1.64	0.019
VEGFA	Vascular endothelial growth factor A, isoform 121	1.05	0.79	1.31	0.051	1.64	0.027
NOTCH3	Neurogenic locus notch homolog protein 3	1.04	0.89	-1.04	0.72	1.64	0.027
ZAP70	Tyrosine-protein kinase ZAP-70	-1.02	0.94	-1.33	0.24	1.62	0.0095
CAMK1D	Calcium/calmodulin-dependent protein kinase type 1D	1.02	0.94	-1.38	0.25	1.58	0.047
CDK5 CDK5R1	Cyclin-dependent kinase 5:Cyclin-dependent kinase 5 activator 1 complex	-1.02	0.96	-1.37	0.27	1.57	0.027
FLT3	Receptor-type tyrosine-protein kinase FLT3	-1.06	0.85	-1.92	0.51	1.57	0.037
AFM	Afamin	1.03	0.93	-1.41	0.16	1.56	0.018
TNFSF11	Tumor necrosis factor ligand superfamily member 11	1.02	0.95	-1.38	0.33	1.56	0.031
DKK4	Dickkopf-related protein 4	-1.03	0.92	-1.33	0.12	1.55	0.0035
IGFBP3	Insulin-like growth factor-binding protein 3	-1.02	0.94	-1.28	0.12	1.55	0.028
PLA2G2A	Phospholipase A2, membrane associated	1	1	-1.42	0.13	1.55	0.037
CCL7	C-C motif chemokine 7	1.02	0.91	-1.03	0.69	1.53	0.026
STK16	Serine/threonine-protein kinase 16	1.03	0.89	-1.38	0.29	1.53	0.042
IL36A	Interleukin-36 alpha	-1.01	0.97	-1.48	0.23	1.53	0.048
F3	Tissue Factor	1.04	0.82	1.03	0.84	1.52	0.0058
SSRP1	FACT complex subunit SSRP1	1.05	0.85	1.09	0.71	1.52	0.025
TNFRSF21	Tumor necrosis factor receptor superfamily member 21	-1.14	0.63	1.13	0.59	1.52	0.044
IGFBP6	Insulin-like growth factor-binding protein 6	1.02	0.96	1.11	0.19	1.51	0.013
RB1	Retinoblastoma-associated protein	1.01	0.98	-1.49	0.24	1.51	0.026
GDF15	Growth/differentiation factor 15	-1.01	0.95	-1.73	0.081	1.5	0.01
CXCL1	Growth-regulated alpha protein	1.01	0.96	-1.03	0.8	1.5	0.018
CAPG	Macrophage-capping protein	1.05	0.74	1.08	0.009	1.49	0.0065
LRPAP1	alpha-2-macroglobulin receptor-associated protein	-1.07	0.47	1.04	0.82	1.49	0.007
CD200	OX-2 membrane glycoprotein	-1.06	0.81	-1.33	0.21	1.49	0.013
PRKAA2 PRKAB2 PRKAG1	AMP Kinase (alpha2beta2gamma1)	1.13	0.48	-1.16	0.56	1.47	0.043
KLK12	Kallikrein-12	1	0.99	-1.3	0.33	1.46	0.015
SERPINA10	Protein Z-dependent protease inhibitor	1	1	-1.43	0.17	1.46	0.048
PLAT	Tissue-type plasminogen activator	1.01	0.97	-1.05	0.4	1.45	0.0024
RGMA	Repulsive guidance molecule A	1.02	0.9	-1.06	0.82	1.45	0.018
DLL1	Delta-like protein 1	-1.02	0.91	-1.44	0.31	1.44	0.00091
APOE	Apolipoprotein E	1.01	0.95	-1.14	0.51	1.44	0.0053
DKK1	Dickkopf-related protein 1	1	0.99	-1.04	0.67	1.44	0.0096
CTSC	Dipeptidyl peptidase 1	-1.03	0.86	-1.08	0.56	1.43	0.014
DPP7	Dipeptidyl peptidase 2	-1	1	-1.34	0.39	1.43	0.043
RAD51	DNA repair protein RAD51 homolog 1	1.02	0.94	-1.23	0.36	1.42	0.01
CDK8 CCNC	Cyclin-dependent kinase 8:Cyclin-C complex	1.01	0.96	-1.2	0.43	1.42	0.026
CFC1	Cryptic protein	1.01	0.98	-1.04	0.49	1.41	0.011
AURKA	Aurora kinase A	1.01	0.98	-1.38	0.25	1.41	0.033
PLA2G7	Platelet-activating factor acetylhydrolase	-1.01	0.98	-1.41	0.17	1.41	0.034
ENTPD3	Ectonucleoside triphosphate diphosphohydrolase 3	1.01	0.97	-1.22	0.07	1.41	0.037
LMAN2	Vesicular integral-membrane protein VIP36	-1.04	0.85	-1.29	0.57	1.41	0.047
BGLAP	Osteocalcin	1.09	0.56	-1.09	0.78	1.4	0.017
HDAC8	Histone deacetylase 8	1.01	0.98	-1.15	0.53	1.4	0.03
FAS	Tumor necrosis factor receptor superfamily member 6	-1.21	0.15	-1.07	0.63	1.4	0.039
SMOC1	SPARC-related modular calcium-binding protein 1	-1.01	0.96	-1.4	0.32	1.4	0.045
ETHE1	Persulfide dioxygenase ETHE1, mitochondrial	1.02	0.96	-1.23	0.42	1.4	0.046
SPARCL1	SPARC-like protein 1	-1	0.98	-1.38	0.29	1.39	0.031
C7	Complement component C7	-1.01	0.96	-1.21	0.3	1.39	0.04
TPO	Thyroid peroxidase	-1.02	0.93	-1.2	0.34	1.38	0.013
BMPR2	Bone morphogenetic protein receptor type-2	1.03	0.92	-1.17	0.44	1.38	0.033
LAYN	Layilin	-1.03	0.91	-1.15	0.21	1.38	0.034
GDF11	Growth/differentiation factor 11	1.05	0.87	-1.31	0.32	1.38	0.044
SERPINA5	Plasma serine protease inhibitor	-1.01	0.95	-1.26	0.18	1.37	0.028
C1QA C1QB C1QC	Complement C1q subcomponent	1.03	0.92	-1.24	0.43	1.37	0.033
PTN	Pleiotrophin	1	1	1.06	0.56	1.36	0.0021
IL37	Interleukin-37	1.04	0.88	-1.24	0.36	1.35	0.021
SPP1	Osteopontin	1.02	0.92	-1.2	0.49	1.34	0.033
IL10RB	Interleukin-10 receptor subunit beta	1	0.99	-1.26	0.11	1.34	0.049
MASP1	Mannan-binding lectin serine protease 1	1	1	-1.25	0.33	1.33	0.013
PDE2A	cGMP-dependent 3',5'-cyclic phosphodiesterase	1.07	0.73	-1.14	0.52	1.33	0.013
C1QBP	Complement component 1 Q subcomponent-binding protein, mitochondrial	1.01	0.91	-1.11	0.59	1.33	0.047
TNFRSF11B	Tumor necrosis factor receptor superfamily member 11B	1.01	0.93	-1.16	0.53	1.32	0.031
AIMP1	Endothelial monocyte-activating polypeptide 2	1.03	0.89	-1.03	0.86	1.31	0.01
RASA1	Ras GTPase-activating protein 1	1.11	0.73	-1.12	0.68	1.31	0.021
PLAU	Urokinase-type plasminogen activator	-1.04	0.85	1.03	0.8	-1.3	0.042
P4HB	Protein disulfide-isomerase	1.08	0.75	1.26	0.11	-1.31	0.045
LGALS2	Galectin-2	1.17	0.53	1.21	0.088	-1.32	0.042
ABL1	Tyrosine-protein kinase ABL1	1.13	0.65	1.16	0.18	-1.34	0.042
UBC	PolyUbiquitin K63-linked	1.29	0.43	-1.43	0.096	-1.49	0.015
TGM3	Protein-glutamine gamma-glutamyltransferase E	-1.02	0.92	-1.57	0.22	-1.55	0.0045
HMGB1	High mobility group protein B1	1.09	0.58	2.15	0.17	-1.61	0.022
PTGS2	Prostaglandin G/H synthase 2	1.28	0.4	2.57	0.25	-1.74	0.022
UBB	PolyUbiquitin K48-linked	1.28	0.49	1.69	0.13	-1.8	0.0099
BAD	Bcl2-associated agonist of cell death	-1.04	0.82	1.23	0.069	-2.32	0.0021
HAAO	3-hydroxyanthranilate 3,4-dioxygenase	1.06	0.73	1.52	0.25	-2.33	0.0045
CEBPB	CCAAT/enhancer-binding protein beta	1.11	0.77	2.86	0.18	-2.97	0.0061
List of proteins dysregulated at least 1.3-fold and significant by T-Test (p-value < 0.05) or Z-score (> 1.96s or < -1.96s). dpi=Days post infection, Red = Significantly Up-regulated; Green = Significantly Down-regulated; Purple = p value < 0.05.
